# Supplementary material
Source: PubMed Central journal article supplement (PMC9868227)
Supplement: 40121_2022_705_MOESM1_ESM.pdf [file 40121_2022_705_MOESM1_ESM.pdf]

Characteristics and outcomes by ceiling of care of subjects hospitalized with COVID-19 during four waves of the pandemic in a metropolitan area: a multi-center cohort study

Pallarès N<sup>1,2</sup>, Tebé C<sup>1,2</sup>, Abelenda-Alonso G<sup>3,4</sup>, Rombauts A<sup>3,4</sup>, Oriol I<sup>2,4,5</sup>, Simonetti AF<sup>6,7</sup>,  
Rodríguez-Molinero A<sup>8</sup>, Izquierdo E<sup>9</sup>, Díaz-Brito V<sup>10</sup>, Molist G<sup>1</sup>, Gómez Melis G<sup>11</sup>,  
Carratalà J<sup>2,3,4,6\*</sup>, Videla S<sup>12,13\*</sup> on behalf of the MetroSud study group and the Divine  
study group

- 1) Biostatistics Unit of the Bellvitge Biomedical Research Institute (IDIBELL), L'Hospitalet de Llobregat, Barcelona, Spain
- 2) Department of Clinical Sciences, School of Medicine and Health Sciences, University of Barcelona, Spain
- 3) Department of Infectious Diseases, Bellvitge University Hospital, Barcelona, Spain
- 4) Bellvitge Biomedical Research Institute (IDIBELL), Barcelona, Spain
- 5) Department of Internal Medicine, Consorci Sanitari Integral, Barcelona, Spain
- 6) CIBERINFEC, Instituto de Salud Carlos III, Madrid, Spain
- 7) Department of Internal Medicine, Consorci Sanitari Alt Penedès Garraf, Barcelona, Spain
- 8) Research Area, Consorci Sanitari Alt Penedès Garraf, Barcelona, Spain
- 9) Department of Anaesthesiology, Viladecans Hospital, Barcelona, Spain
- 10) Department Infectious Diseases, Parc Sanitari Sant Joan de Deu, Sant Boi de Llobregat, Barcelona, Spain
- 11) Department of Statistics and Operations Research, Universitat Politècnica de Catalunya/Barcelonatech, Barcelona, Spain
- 12) Department of Clinical Pharmacology, Bellvitge University Hospital, Barcelona, Spain
- 13) Department of Pathology and Experimental Therapeutics, School of Medicine and Health Sciences, University of Barcelona, Spain

\* Joint senior authors

**Corresponding author**

Cristian Tebé, PhD

Biostatistics Unit

Bellvitge Biomedical Research Institute (IDIBELL)

Avinguda de la Granvia de l'Hospitalet, 199,

08908 L'Hospitalet de Llobregat, Barcelona, Spain

ctebe@idibell.cat

Table S1: Number of subjects included by centre and wave

| CENTER                                      | 1 <sup>st</sup> wave | 2 <sup>nd</sup> wave | 3 <sup>rd</sup> wave | 4 <sup>th</sup> wave |
|---------------------------------------------|----------------------|----------------------|----------------------|----------------------|
| Hospital Universitari de Bellvitge          | 1133                 | 323                  | 395                  | 579                  |
| Consorti Sanitari de l'Alt Penedès i Garraf | 403                  | 226                  | 373                  | 276                  |
| Consorti Sanitari Integral                  | 923                  | 177                  |                      |                      |
| Hospital de Viladecans                      | 406                  | 60                   |                      |                      |
| Hospital de Sant Boi de Llobregat           | 541                  |                      |                      |                      |

TABLE S2: Previous treatments at hospital admission through waves by ceiling of care

|                                        | CEILING OF CARE |                |               |               |               | NO CEILING OF CARE |                |                |                |                |
|----------------------------------------|-----------------|----------------|---------------|---------------|---------------|--------------------|----------------|----------------|----------------|----------------|
|                                        | [ALL]           | 1              | 2             | 3             | 4             | [ALL]              | 1              | 2              | 3              | 4              |
|                                        | <i>N=1827</i>   | <i>N=1326</i>  | <i>N=175</i>  | <i>N=163</i>  | <i>N=163</i>  | <i>N=3974</i>      | <i>N=2072</i>  | <i>N=605</i>   | <i>N=605</i>   | <i>N=692</i>   |
| <b>Statins, N (%)</b>                  | 656<br>(40.5%)  | 443<br>(39.6%) | 79<br>(45.1%) | 73<br>(44.8%) | 61<br>(37.4%) | 838<br>(23.0%)     | 428<br>(24.5%) | 149<br>(24.7%) | 154<br>(25.5%) | 107<br>(15.5%) |
| <b>Corticosteroids, N (%)</b>          | 147<br>(8.07%)  | 117<br>(8.86%) | 12<br>(6.86%) | 12<br>(7.36%) | 6<br>(3.68%)  | 150<br>(3.78%)     | 89<br>(4.30%)  | 18<br>(2.99%)  | 34<br>(5.63%)  | 9<br>(1.30%)   |
| <b>ACE inhibitors, N (%)</b>           | 504<br>(27.7%)  | 343<br>(25.9%) | 54<br>(30.9%) | 57<br>(35.2%) | 50<br>(30.7%) | 684<br>(17.2%)     | 358<br>(17.3%) | 120<br>(19.8%) | 118<br>(19.5%) | 88<br>(12.7%)  |
| <b>ARA II, N (%)</b>                   | 358<br>(19.6%)  | 256<br>(19.3%) | 41<br>(23.4%) | 25<br>(15.3%) | 36<br>(22.1%) | 409<br>(10.3%)     | 216<br>(10.4%) | 59<br>(9.77%)  | 80<br>(13.2%)  | 54<br>(7.80%)  |
| <b>Systemic corticosteroids, N (%)</b> | 121<br>(8.67%)  | 70<br>(7.83%)  | 19<br>(10.9%) | 16<br>(9.82%) | 16<br>(9.82%) | 138<br>(3.59%)     | 58<br>(2.99%)  | 35<br>(5.79%)  | 24<br>(3.97%)  | 21<br>(3.03%)  |
| <b>Inhaled corticosteroids, N (%)</b>  | 258<br>(14.4%)  | 190<br>(14.7%) | 24<br>(13.7%) | 18<br>(11.0%) | 26<br>(16.0%) | 243<br>(6.15%)     | 130<br>(6.35%) | 34<br>(5.63%)  | 52<br>(8.60%)  | 27<br>(3.90%)  |
| <b>Anticoagulants, N (%)</b>           | 363<br>(20.1%)  | 225<br>(17.3%) | 57<br>(32.6%) | 38<br>(23.3%) | 43<br>(26.4%) | 207<br>(5.24%)     | 101<br>(4.93%) | 32<br>(5.31%)  | 42<br>(6.94%)  | 32<br>(4.62%)  |
| <b>Immunosuppressants, N (%)</b>       | 39<br>(2.77%)   | 23<br>(2.54%)  | 5<br>(2.86%)  | 7<br>(4.29%)  | 4<br>(2.45%)  | 124<br>(3.14%)     | 63<br>(3.07%)  | 26<br>(4.30%)  | 14<br>(2.31%)  | 21<br>(3.03%)  |

TABLE S3: Clinical symptoms at hospital admission through waves by ceiling of care

|                                   | CEILING OF CARE |                |                |               |               | NO CEILING OF CARE |                 |                |                |                |
|-----------------------------------|-----------------|----------------|----------------|---------------|---------------|--------------------|-----------------|----------------|----------------|----------------|
|                                   | [ALL]           | 1              | 2              | 3             | 4             | [ALL]              | 1               | 2              | 3              | 4              |
|                                   | <i>N=1831</i>   | <i>N=1330</i>  | <i>N=175</i>   | <i>N=163</i>  | <i>N=163</i>  | <i>N=3984</i>      | <i>N=2076</i>   | <i>N=611</i>   | <i>N=605</i>   | <i>N=692</i>   |
| <b>Fever, N (%)</b>               | 1274<br>(69.6%) | 986<br>(74.1%) | 108<br>(61.7%) | 86<br>(52.8%) | 94<br>(57.7%) | 3215<br>(80.7%)    | 1767<br>(85.1%) | 462<br>(75.6%) | 453<br>(74.9%) | 533<br>(77.0%) |
| <b>Cough, N (%)</b>               | 1092<br>(59.6%) | 821<br>(61.7%) | 93<br>(53.1%)  | 90<br>(55.2%) | 88<br>(54.0%) | 2954<br>(74.1%)    | 1604<br>(77.3%) | 427<br>(69.9%) | 421<br>(69.6%) | 502<br>(72.5%) |
| <b>Shortness of breath, N (%)</b> | 855<br>(46.7%)  | 604<br>(45.4%) | 86<br>(49.1%)  | 87<br>(53.4%) | 78<br>(47.9%) | 2102<br>(52.8%)    | 985<br>(47.4%)  | 367<br>(60.1%) | 350<br>(57.9%) | 400<br>(57.8%) |
| <b>Anosmia, N (%)</b>             | 77<br>(4.21%)   | 52<br>(3.91%)  | 9<br>(5.14%)   | 11<br>(6.75%) | 5<br>(3.07%)  | 589<br>(14.8%)     | 245<br>(11.8%)  | 111<br>(18.2%) | 85<br>(14.0%)  | 148<br>(21.4%) |
| <b>Ageusia, N (%)</b>             | 86<br>(4.70%)   | 61<br>(4.59%)  | 8<br>(4.57%)   | 14<br>(8.59%) | 3<br>(1.84%)  | 631<br>(15.8%)     | 276<br>(13.3%)  | 109<br>(17.8%) | 101<br>(16.7%) | 145<br>(21.0%) |
| <b>Diarrhea, N (%)</b>            | 374<br>(20.4%)  | 266<br>(20.0%) | 33<br>(18.9%)  | 40<br>(24.5%) | 35<br>(21.5%) | 1122<br>(28.2%)    | 623<br>(30.0%)  | 146<br>(23.9%) | 165<br>(27.3%) | 188<br>(27.2%) |
| <b>Arthromyalgia, N (%)</b>       | 360<br>(19.7%)  | 298<br>(22.4%) | 27<br>(15.4%)  | 17<br>(10.4%) | 18<br>(11.0%) | 1274<br>(32.0%)    | 663<br>(31.9%)  | 199<br>(32.6%) | 195<br>(32.2%) | 217<br>(31.4%) |

TABLE S4: Treatments received by subjects during hospital stay through waves by ceiling of care

|                                            | CEILING OF CARE          |                          |                         |                         |                         | NO CEILING OF CARE       |                          |                         |                         |                         |
|--------------------------------------------|--------------------------|--------------------------|-------------------------|-------------------------|-------------------------|--------------------------|--------------------------|-------------------------|-------------------------|-------------------------|
|                                            | [ALL]                    | 1                        | 2                       | 3                       | 4                       | [ALL]                    | 1                        | 2                       | 3                       | 4                       |
|                                            | <i>N=182</i><br><i>8</i> | <i>N=132</i><br><i>7</i> | <i>N=17</i><br><i>5</i> | <i>N=16</i><br><i>3</i> | <i>N=16</i><br><i>3</i> | <i>N=398</i><br><i>3</i> | <i>N=207</i><br><i>5</i> | <i>N=61</i><br><i>1</i> | <i>N=60</i><br><i>5</i> | <i>N=69</i><br><i>2</i> |
| <b>Antiviral use, N (%)</b>                | 1385<br>(75.8<br>%)      | 1163<br>(87.6<br>%)      | 57<br>(32.6<br>%)       | 74<br>(45.4<br>%)       | 91<br>(55.8<br>%)       | 2818<br>(70.8<br>%)      | 1947<br>(93.8<br>%)      | 214<br>(35.0<br>%)      | 248<br>(41.0<br>%)      | 409<br>(59.1<br>%)      |
| <b>Lopinavir/Ritonavir, N (%)</b>          | 539<br>(32.4<br>%)       | 539<br>(46.3<br>%)       | 0<br>(0.00<br>%)        | 0<br>(0.00<br>%)        | 0<br>(0.00<br>%)        | 1150<br>(29.8<br>%)      | 1150<br>(59.1<br>%)      | 0<br>(0.00<br>%)        | 0<br>(0.00<br>%)        | 0<br>(0.00<br>%)        |
| <b>Hydroxychloroquine, N (%)</b>           | 1151<br>(69.2<br>%)      | 1150<br>(98.9<br>%)      | 1<br>(0.57<br>%)        | 0<br>(0.00<br>%)        | 0<br>(0.00<br>%)        | 1916<br>(49.7<br>%)      | 1914<br>(98.3<br>%)      | 1<br>(0.16<br>%)        | 0<br>(0.00<br>%)        | 1<br>(0.14<br>%)        |
| <b>Interferon beta, N (%)</b>              | 118<br>(8.52<br>%)       | 118<br>(10.1<br>%)       | 0<br>(0.00<br>%)        | 0<br>(0.00<br>%)        | 0<br>(0.00<br>%)        | 196<br>(6.96<br>%)       | 196<br>(10.1<br>%)       | 0<br>(0.00<br>%)        | 0<br>(0.00<br>%)        | 0<br>(0.00<br>%)        |
| <b>Tocilizumab, N (%)</b>                  | 207<br>(14.9<br>%)       | 91<br>(7.82<br>%)        | 26<br>(45.6<br>%)       | 43<br>(58.1<br>%)       | 47<br>(51.6<br>%)       | 845<br>(30.0<br>%)       | 397<br>(20.4<br>%)       | 89<br>(41.6<br>%)       | 83<br>(33.5<br>%)       | 276<br>(67.5<br>%)      |
| <b>Remdesivir, N (%)</b>                   | 142<br>(10.3<br>%)       | 1<br>(0.09<br>%)         | 35<br>(61.4<br>%)       | 42<br>(56.8<br>%)       | 64<br>(70.3<br>%)       | 564<br>(20.0<br>%)       | 25<br>(1.28<br>%)        | 139<br>(65.0<br>%)      | 193<br>(77.8<br>%)      | 207<br>(50.6<br>%)      |
| <b>Antibiotic use, N (%)</b>               | 1377<br>(75.3<br>%)      | 1124<br>(84.7<br>%)      | 91<br>(52.0<br>%)       | 81<br>(49.7<br>%)       | 81<br>(49.7<br>%)       | 2520<br>(63.3<br>%)      | 1854<br>(89.3<br>%)      | 263<br>(43.0<br>%)      | 207<br>(34.2<br>%)      | 196<br>(28.3<br>%)      |
| <b>Amoxicillin, N (%)</b>                  | 414<br>(31.2<br>%)       | 414<br>(31.2<br>%)       | 0 (.%)                  | 0 (.%)                  | 0 (.%)                  | 695<br>(33.5<br>%)       | 695<br>(33.5<br>%)       | 0 (.%)                  | 0 (.%)                  | 0 (.%)                  |
| <b>Amoxicillin /Clavulanic acid, N (%)</b> | 464<br>(25.4<br>%)       | 361<br>(27.2<br>%)       | 27<br>(15.4<br>%)       | 36<br>(22.1<br>%)       | 40<br>(24.5<br>%)       | 876<br>(22.0<br>%)       | 664<br>(32.0<br>%)       | 57<br>(9.33<br>%)       | 79<br>(13.1<br>%)       | 76<br>(11.0<br>%)       |
| <b>Azithromycin, N (%)</b>                 | 542<br>(29.6<br>%)       | 534<br>(40.2<br>%)       | 3<br>(1.71<br>%)        | 1<br>(0.61<br>%)        | 4<br>(2.45<br>%)        | 1194<br>(30.0<br>%)      | 1153<br>(55.6<br>%)      | 19<br>(3.11<br>%)       | 7<br>(1.16<br>%)        | 15<br>(2.17<br>%)       |

|                                           | CEILING OF CARE    |                    |                    |                    |                    | NO CEILING OF CARE  |                    |                    |                    |                    |
|-------------------------------------------|--------------------|--------------------|--------------------|--------------------|--------------------|---------------------|--------------------|--------------------|--------------------|--------------------|
|                                           | [ALL]              | 1                  | 2                  | 3                  | 4                  | [ALL]               | 1                  | 2                  | 3                  | 4                  |
| <b>Ceftriaxone, N (%)</b>                 | 606<br>(33.2<br>%) | 530<br>(39.9<br>%) | 41<br>(23.4<br>%)  | 19<br>(11.7<br>%)  | 16<br>(9.82<br>%)  | 1053<br>(26.4<br>%) | 795<br>(38.3<br>%) | 132<br>(21.6<br>%) | 72<br>(11.9<br>%)  | 54<br>(7.80<br>%)  |
| <b>Levofloxacin, N (%)</b>                | 136<br>(7.44<br>%) | 95<br>(7.16<br>%)  | 15<br>(8.57<br>%)  | 16<br>(9.82<br>%)  | 10<br>(6.13<br>%)  | 226<br>(5.67<br>%)  | 122<br>(5.88<br>%) | 35<br>(5.73<br>%)  | 35<br>(5.79<br>%)  | 34<br>(4.91<br>%)  |
| <b>Piperacillin, N (%)</b>                | 99<br>(7.46<br>%)  | 99<br>(7.46<br>%)  | 0 (.%)             | 0 (.%)             | 0 (.%)             | 184<br>(8.87<br>%)  | 184<br>(8.87<br>%) | 0 (.%)             | 0 (.%)             | 0 (.%)             |
| <b>Corticosteroid, N (%)</b>              | 852<br>(61.5<br>%) | 399<br>(44.3<br>%) | 152<br>(88.4<br>%) | 150<br>(96.8<br>%) | 151<br>(95.6<br>%) | 2456<br>(63.1<br>%) | 698<br>(34.2<br>%) | 552<br>(92.5<br>%) | 566<br>(96.6<br>%) | 640<br>(95.7<br>%) |
| <b>Type of corticosteroid,<br/>N (%):</b> |                    |                    |                    |                    |                    |                     |                    |                    |                    |                    |
| Dexamethasone                             | 483<br>(50.2<br>%) | 81<br>(15.8<br>%)  | 126<br>(82.9<br>%) | 141<br>(94.6<br>%) | 135<br>(90.0<br>%) | 1751<br>(72.4<br>%) | 66<br>(9.97<br>%)  | 514<br>(93.5<br>%) | 550<br>(97.3<br>%) | 621<br>(97.0<br>%) |
| Hydrocortisone                            | 35<br>(3.63<br>%)  | 27<br>(5.27<br>%)  | 4<br>(2.63<br>%)   | 1<br>(0.67<br>%)   | 3<br>(2.00<br>%)   | 30<br>(1.24<br>%)   | 21<br>(3.17<br>%)  | 5<br>(0.91<br>%)   | 2<br>(0.35<br>%)   | 2<br>(0.31<br>%)   |
| Methylprednisolone                        | 379<br>(39.4<br>%) | 357<br>(69.7<br>%) | 10<br>(6.58<br>%)  | 3<br>(2.01<br>%)   | 9<br>(6.00<br>%)   | 553<br>(22.9<br>%)  | 521<br>(78.7<br>%) | 15<br>(2.73<br>%)  | 9<br>(1.59<br>%)   | 8<br>(1.25<br>%)   |
| Prednisolone                              | 7<br>(0.73<br>%)   | 7<br>(1.37<br>%)   | 0<br>(0.00<br>%)   | 0<br>(0.00<br>%)   | 0<br>(0.00<br>%)   | 17<br>(0.70<br>%)   | 16<br>(2.42<br>%)  | 1<br>(0.18<br>%)   | 0<br>(0.00<br>%)   | 0<br>(0.00<br>%)   |
| Prednisone                                | 59<br>(6.13<br>%)  | 40<br>(7.81<br>%)  | 12<br>(7.89<br>%)  | 4<br>(2.68<br>%)   | 3<br>(2.00<br>%)   | 66<br>(2.73<br>%)   | 38<br>(5.74<br>%)  | 15<br>(2.73<br>%)  | 4<br>(0.71<br>%)   | 9<br>(1.41<br>%)   |
